# Supplementary material for: A combinatorial library of triazine-cored polymeric vectors for pDNA delivery in vitro and in vivo
Source: Royal Society of Chemistry journal article supplement (doi:10.1039/c6tb03311c), 2017-01-01
Supplement: c6tb03311c1.pdf [file c6tb03311c1.pdf]

## Supplementary Materials

### **A Combinatorial Library of Triazine-cored Polymeric Vectors for pDNA delivery *in vitro* and *in vivo***

*Mingxing Wang\**, Bo Wu, Jason D. Tucker, Peijuan Lu, Qilong Lu

McColl-Lockwood Laboratory for Muscular Dystrophy Research, Cannon Research Center,  
Carolinas Medical Center, 1000 Blythe Blvd. Charlotte, NC 28231, USA

*Tel.: 1-704-355-5588; Fax: 1-704-355-1679; \*Email: [mingxing.wang@carolinashealthcare.org](mailto:mingxing.wang@carolinashealthcare.org)*

## 1. Characterization of Trazine-core Amphiphilic Polymers (TAPs)

The composition of the final products was characterized by the  $^1\text{H-NMR}$  spectra using integral values obtained for the  $-\text{CH}_2\text{CH}_2\text{O}-$  or  $\text{CH}_3-$  protons of Jeffamine and  $-\text{CH}_2\text{CH}_2\text{NH}-$  protons of PEI. Such as the  $\text{A}_4\text{B}_2$  series polymers' NMR were given in **Figure S1**, and the integral data of specific protons were agreement well with the polymer's composition as the expected. The molecular weight ( $M_w$ ) of the polymers was measured by MADAL-TOF Mass (such as the  $1\text{A}_41\text{B}_3$  was given in **Figure S2**).

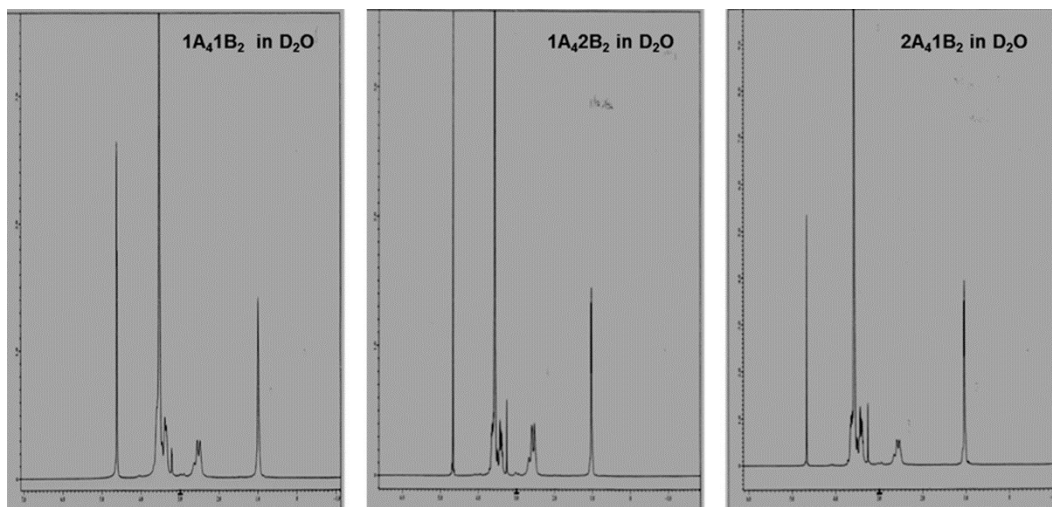

**Figure S1.**  $^1\text{H-NMR}$  of  $\text{A}_4\text{B}_2$  series TAPs in  $\text{D}_2\text{O}$  with 500 MHz JEOL.

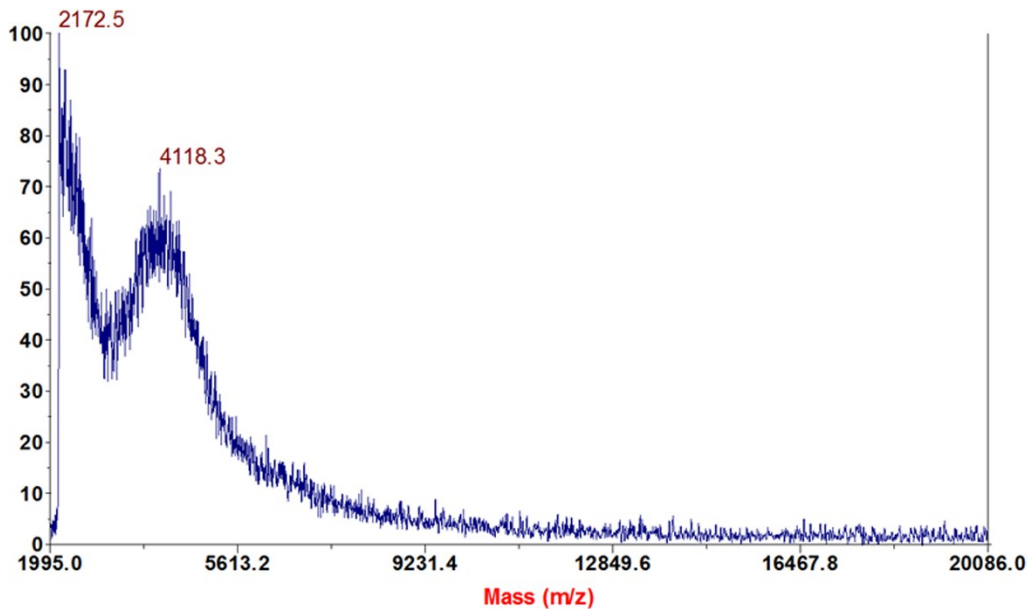

**Figure S2.** TOF-Mass spectrum of  $1\text{A}_41\text{B}_3$

2. pDNA delivery in HSkM cell line transfected with polymer/pDNA complexes at weight ratios of 5 & 10 after 48 hrs incubation (pDNA 1  $\mu$ g in 500  $\mu$ L 10% FBS-medium).

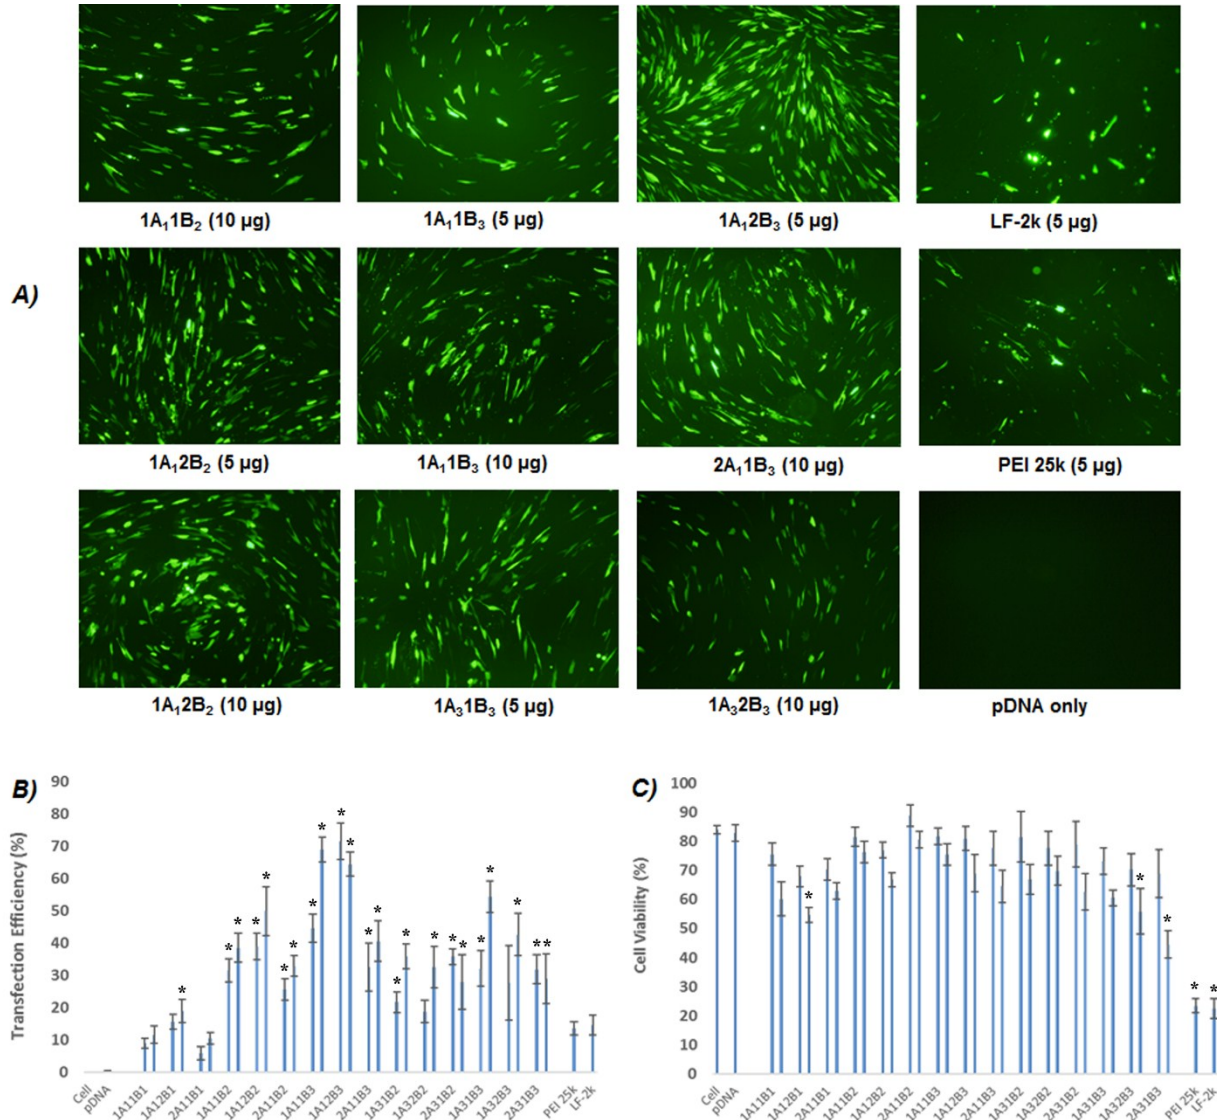

**Figure S3.** pDNA delivery in HSkM cell line transfected with polymer/pDNA complexes at weight ratios of 5 & 10 after 48 hrs incubation. [TAPs (5/10  $\mu$ g), PEI 25k, LF-2k (5  $\mu$ g); pDNA 1  $\mu$ g in 500  $\mu$ L 10% FBS medium]. Column A: GFP expression examined under fluorescent microscopy. Original magnification, x200. B) Transfection efficiency analyzed with FACS (Data represent mean  $\pm$  SD, n = 3, two-tailed Student t-test, \*  $p$  < 0.05 compared with PEI 25k). C) Cell viability ((Data represent mean  $\pm$  SD, n = 3, two-tailed Student t-test, \*  $p$  < 0.05 compared with untreated cell).
